# Supplementary material for: Enhancer activation from transposable elements in extrachromosomal DNA
Source: PubMed Central journal article supplement — bioRxiv. 2025 Sep 8:2024.09.04.611262. Originally published 2024 Sep 8. Preprint. [Version 2] doi: 10.1101/2024.09.04.611262 (PMC11398463; doi:10.1101/2024.09.04.611262), 2025-09-08
Supplement: NIHPP2024.09.04.611262v1-supplement-1.pdf [file NIHPP2024.09.04.611262v1-supplement-1.pdf]

**Supplementary tables:**

[https://www.dropbox.com/scl/fi/fdoj90axtnf30wlw3oyf0/Supplementary\\_tables.xlsx?rlkey=10y7nttg1w08saj4yx4m4ddzh&dl=0](https://www.dropbox.com/scl/fi/fdoj90axtnf30wlw3oyf0/Supplementary_tables.xlsx?rlkey=10y7nttg1w08saj4yx4m4ddzh&dl=0)
